# Supplementary material
Source: PubMed Central journal article supplement (PMC4313364)
Supplement: mmc3.pdf [file mmc3.pdf]

**Table S3. Primers for RT-qPCR, Related to Figures 1, 3, 5, 6, 7, and S6**

| Target                   |         | 5' → 3'                   |
|--------------------------|---------|---------------------------|
| <i>β-ACTIN</i>           | Forward | ATAGCAACGTACATGGCTGG      |
|                          | Reverse | CACCTTCTACAATGAGCTGC      |
| <i>GAPDH</i>             | Forward | CGCTTCGCTCTCTGCTCCTCCTGT  |
|                          | Reverse | GGTGACCAGGCGCCCAATACGA    |
| <i>mCherry</i>           | Forward | GATAACATGGCCATCATCAAGGA   |
|                          | Reverse | CGTGGCCGTTACGGAG          |
| <i>TNAP</i>              | Forward | AAGCAGGTCTTGGGGTGCACCA    |
|                          | Reverse | TTGGTCTCGCCAGTACTTGGGGT   |
| <i>NANOS3</i>            | Forward | CCCGAAACTCGGCAGGCAAGA     |
|                          | Reverse | AAGGCTCAGACTTCCCGGCAC     |
| <i>KIT</i>               | Forward | TGCATTCAAGCACAATGGCACGG   |
|                          | Reverse | GTGTGGGGATGGATTTGCTCTTTGT |
| <i>BLIMP1</i>            | Forward | CGGGGAGAATGTGGACTGGGTAGAG |
|                          | Reverse | CTGGAGTTACACTTGGGGGCAGC   |
| <i>TFAP2C</i>            | Forward | CGCTCATGTGACTCTCCTGACATCC |
|                          | Reverse | TGGGCCGCAATAGCATGTTCT     |
| <i>OCT4</i>              | Forward | GCTGGAGCAAAACCCGGAGG      |
|                          | Reverse | TCGGCCTGTGTATATCCCAGGGTG  |
| <i>NANOG</i>             | Forward | TGCTGAGATGCCTCACACGGA     |
|                          | Reverse | TGACCGGGACCTTGTCTTCCTT    |
| <i>STELLA</i>            | Forward | ACGCCGATGGACCCATCACAGTTT  |
|                          | Reverse | TCTCGGAGGAGATTTGAGAGGCC   |
| <i>PRDM14</i>            | Forward | CTACCGAGCCCGAGTGGCCTAC    |
|                          | Reverse | TAGAGCCATCCCGGGACCGCA     |
| <i>SOX2</i>              | Forward | ACACCAA TCCCA TCCACACT    |
|                          | Reverse | CCTCCCCAGGTTTTCTCTGT      |
| <i>SOX17</i>             | Forward | GAGCCAAGGGCGAGTCCCGTA     |
|                          | Reverse | CCTTCCACGACTTGCCCAGCAT    |
| <i>HOXA1</i>             | Forward | CGGGAACCTGGGGGTGCTCTAC    |
|                          | Reverse | TTCTTGGTGGGTCTGCTTCTGA    |
| <i>MYC</i>               | Forward | GGACCCGCTTCTCTGAAAGG      |
|                          | Reverse | TAACGTTGAGGGGCATCGTC      |
| <i>T<br/>(BRACHYURY)</i> | Forward | ACCCAGTTCATAGCGGTGAC      |
|                          | Reverse | CCATTGGGAGTACCCAGTT       |
| <i>HOXB1</i>             | Forward | GCGAGCTTTGCACCGGCCTA      |
|                          | Reverse | ACCTTCGCTGTCTTGGGTGGGT    |
| <i>GATA6</i>             | Forward | CCCACAACACAACCTACAGC      |
|                          | Reverse | GCGAGACTGACGCCTATGTA      |
| <i>DND1</i>              | Forward | TGCTGGGACAGGGACCTATG      |
|                          | Reverse | ACGGCCATGGAAGATCACTG      |
| <i>KLF4</i>              | Forward | TACCAAGAGCTCATGCCACC      |
|                          | Reverse | CGCGTAATCACAAGTGTGGG      |

|               |         |                       |
|---------------|---------|-----------------------|
| <i>UTF1</i>   | Forward | GACCAGCTGCTGACCTTGAAC |
|               | Reverse | CCAGGGACACTGTCTGGTCG  |
| <i>HOXC4</i>  | Forward | ATCTCTCCCCACCCCTATCG  |
|               | Reverse | TGATCACGGGGCATTTCACA  |
| <i>MIXL1</i>  | Forward | TACCCCGTCTCTTCAACCCT  |
|               | Reverse | GCATGCAGAGTCATTGGAGC  |
| <i>PDGFRA</i> | Forward | CTCCCTGGCTGTTCTGATCG  |
|               | Reverse | TGCCAACCCCTGTTCCAAAGT |
| <i>EOMES</i>  | Forward | CTGGCTTCCGTGCCACGTC   |
|               | Reverse | CATGCGCCTGCCCTGTTTCG  |
| <i>CDX2</i>   | Forward | TCACCATCCGGAGGAAAGCC  |
|               | Reverse | CTCTCCTTTGCTCTGCGGTT  |
| <i>KDR</i>    | Forward | ACATTCAGCTCAAGGCTCCC  |
|               | Reverse | TGAACCTCCCGCATTTCAGTC |
| <i>GATA4</i>  | Forward | TCCCTCTCCCTCCTCAAAT   |
|               | Reverse | TCAGCGTGTAAGGCATCTG   |
| <i>FOXA1</i>  | Forward | AAGGCATACGAACAGGCACTG |
|               | Reverse | TACACACCTTGGTAGTACGCC |
| <i>HNF1B</i>  | Forward | CAATCCACTCTCAGGAGGCG  |
|               | Reverse | ATCGTGGGAGAGGCATTGTG  |
| <i>HNF4A</i>  | Forward | GGCAATGTGTCAGGGAGGAA  |
|               | Reverse | CAGGGATTTCAGGGGCACTT  |
